# Supplementary material for: Early and Real-Time Detection of Seasonal Influenza Onset
Source: PLoS Comput Biol. 2017 Feb 3;13(2):e1005330. doi: 10.1371/journal.pcbi.1005330 (PMC5291378; doi:10.1371/journal.pcbi.1005330)
Supplement: S4 Data — Total number of received and answered calls. (CSV) [file pcbi.1005330.s024.csv]

2010-07-04	6365	6104
2010-07-11	11772	11319
2010-07-18	10305	9920
2010-07-25	10172	9759
2010-08-01	10812	10233
2010-08-08	10956	10379
2010-08-15	11130	10432
2010-08-22	9611	9160
2010-08-29	10128	9451
2010-09-05	9965	9622
2010-09-12	9432	9041
2010-09-19	10275	9688
2010-09-26	10356	9746
2010-10-03	10868	10209
2010-10-10	11308	10712
2010-10-17	11356	10799
2010-10-24	11711	11233
2010-10-31	12004	11494
2010-11-07	12250	11648
2010-11-14	12565	11779
2010-11-21	12129	11670
2010-11-28	11990	11617
2010-12-05	12736	12216
2010-12-12	14783	13781
2010-12-19	17590	15119
2010-12-26	21783	18681
2011-01-02	24780	20449
2011-01-09	21246	20155
2011-01-16	19505	18953
2011-01-23	18139	17524
2011-01-30	17068	16419
2011-02-06	15902	15328
2011-02-13	14958	14546
2011-02-20	14117	13735
2011-02-27	14057	13409
2011-03-06	13842	12832
2011-03-13	13840	13308
2011-03-20	13653	12891
2011-03-27	13460	12885
2011-04-03	13788	13132
2011-04-10	13384	12861
2011-04-17	12947	12392
2011-04-24	12467	12075
2011-05-01	12093	11616
2011-05-08	12155	11568
2011-05-15	12778	12258
2011-05-22	13626	12907
2011-05-29	13057	12359
2011-06-05	13004	12265
2011-06-12	12042	11454
2011-06-19	12520	11869
2011-06-26	12543	11978
2011-07-03	12858	11924
2011-07-10	11161	10763
2011-07-17	11163	10697
2011-07-24	11101	10573
2011-07-31	11959	11137
2011-08-07	11230	10622
2011-08-14	11090	10501
2011-08-21	10722	10274
2011-08-28	9959	9567
2011-09-04	9261	8883
2011-09-11	9740	9392
2011-09-18	10313	9921
2011-09-25	10512	9939
2011-10-02	12516	11586
2011-10-09	13056	12444
2011-10-16	12389	11854
2011-10-23	11996	11525
2011-10-30	11385	10945
2011-11-06	11304	10917
2011-11-13	11424	11029
2011-11-20	11417	10983
2011-11-27	11750	11101
2011-12-04	11712	11102
2011-12-11	12577	12228
2011-12-18	12768	12400
2011-12-25	13301	12569
2012-01-01	14058	13494
2012-01-08	14355	14013
2012-01-15	15181	14724
2012-01-22	16277	15614
2012-01-29	16518	15972
2012-02-05	17341	16641
2012-02-12	18321	17389
2012-02-19	18870	17593
2012-02-26	19701	18403
2012-03-04	19854	18459
2012-03-11	18752	17448
2012-03-18	16299	15853
2012-03-25	15692	15221
2012-04-01	15835	15405
2012-04-08	13584	13234
2012-04-15	14070	13450
2012-04-22	14593	13814
2012-04-29	15582	14551
2012-05-06	15954	15509
2012-05-13	16918	15567
2012-05-20	18263	17246
2012-05-27	16291	15793
2012-06-03	16641	16051
2012-06-10	17149	16287
2012-06-17	15680	15044
2012-06-24	14662	14163
2012-07-01	15872	14770
2012-07-08	14119	13565
2012-07-15	13574	13038
2012-07-22	14420	13718
2012-07-29	14419	13822
2012-08-05	13162	12556
2012-08-12	13420	12807
2012-08-19	13719	13137
2012-08-26	13478	12840
2012-09-02	12634	12233
2012-09-09	12911	12527
2012-09-16	12929	12422
2012-09-23	13275	12699
2012-09-30	13357	12738
2012-10-07	15323	14221
2012-10-14	14906	14419
2012-10-21	14113	13492
2012-10-28	14011	13583
2012-11-04	13559	13179
2012-11-11	13275	12896
2012-11-18	13904	13441
2012-11-25	14047	13545
2012-12-02	13673	13237
2012-12-09	13669	13115
2012-12-16	14199	13693
2012-12-23	14886	14236
2012-12-30	15094	14462
2013-01-06	14427	13984
2013-01-13	14297	13660
2013-01-20	14515	14059
2013-01-27	14550	14152
2013-02-03	14120	13703
2013-02-10	14112	13693
2013-02-17	14346	13876
2013-02-24	14924	14129
2013-03-03	16948	16021
2013-03-10	16632	15974
2013-03-17	14817	14298
2013-03-24	13489	13066
2013-03-31	13110	12618
2013-04-07	12395	11824
2013-04-14	11957	11401
2013-04-21	11976	11423
2013-04-28	13550	12782
2013-05-05	13787	13349
2013-05-12	13871	13278
2013-05-19	13637	13051
2013-05-26	14107	13351
2013-06-02	14029	13506
2013-06-09	14937	14206
2013-06-16	14386	13918
2013-06-23	13358	12951
2013-06-30	14398	13816
2013-07-07	15676	14778
2013-07-14	16018	15129
2013-07-21	13315	12970
2013-07-28	13093	12745
2013-08-04	13065	12632
2013-08-11	12617	12239
2013-08-18	13219	12766
2013-08-25	12866	12380
2013-09-01	12468	12054
2013-09-08	12078	11665
2013-09-15	12338	11803
2013-09-22	12954	12266
2013-09-29	13664	12945
2013-10-06	13191	12786
2013-10-13	13147	12611
2013-10-20	13282	12742
2013-10-27	12876	12442
2013-11-03	12139	11842
2013-11-10	13065	12678
2013-11-17	12631	12238
2013-11-24	12262	11832
2013-12-01	12501	12020
2013-12-08	12919	12189
2013-12-15	13955	13175
2013-12-22	14294	13566
2013-12-29	16611	15150
2014-01-05	18166	14908
2014-01-12	15764	15045
2014-01-19	18687	15882
2014-01-26	22170	15004
2014-02-02	19616	15236
2014-02-09	16841	14503
2014-02-16	15252	13615
2014-02-23	14258	13278
2014-03-02	14261	13517
2014-03-09	13727	12860
2014-03-16	13135	12358
2014-03-23	12864	12257
2014-03-30	12202	11838
2014-04-06	12509	12087
2014-04-13	13020	12412
2014-04-20	12924	12420
2014-04-27	12919	12295
2014-05-04	12570	11897
2014-05-11	13177	12294
2014-05-18	13566	12616
2014-05-25	12556	11816
2014-06-01	12400	11685
2014-06-08	13076	12459
2014-06-15	13764	12930
2014-06-22	14091	12649
2014-06-29	12426	11126
2014-07-06	13055	11095
2014-07-13	13823	11593
2014-07-20	13781	11722
2014-07-27	12766	11275
2014-08-03	12773	11199
2014-08-10	14351	11085
2014-08-17	14404	11246
2014-08-24	13825	11007
2014-08-31	12917	10636
2014-09-07	12941	11054
2014-09-14	12612	11309
2014-09-21	12849	10802
2014-09-28	13742	11442
2014-10-05	14483	11688
2014-10-12	15522	12553
2014-10-19	18027	13164
2014-10-26	18771	13855
2014-11-02	17306	13317
2014-11-09	20112	14012
2014-11-16	23677	14411
2014-11-23	17793	13979
2014-11-30	17435	13472
2014-12-07	17494	12216
2014-12-14	17601	12092
2014-12-21	17642	12536
2014-12-28	20446	12539
2015-01-04	21884	14205
2015-01-11	24053	14175
2015-01-18	29476	15025
2015-01-25	33024	16900
2015-02-01	27902	18787
2015-02-08	22362	18790
2015-02-15	19794	17509
2015-02-22	19116	16624
2015-03-01	14734	13842
